# Supplementary material for: An efficient catalyst-free one-pot synthesis of primary amides from the aldehydes of the Baylis–Hillman reaction
Source: Royal Society of Chemistry journal article supplement (doi:10.1039/c7nj01965c), 2017-01-01
Supplement: c7nj01965c1.pdf [file c7nj01965c1.pdf]

## **Supporting Information**

### **An efficient catalyst-free one-pot synthesis of primary amides from aldehydes of Baylis-Hillman Reaction**

Thatikonda Narendar Reddy,<sup>\*ab</sup> Raktani Bikshapathi,<sup>ab</sup> Perla Ramesh,<sup>c</sup> Mettu Ravinder,<sup>ab</sup>  
Vaidya Jayathirtha Rao,<sup>\*ab</sup> and N. Jagadeesh Babu<sup>d</sup>

<sup>a</sup>*Crop Protection Chemicals Division, CSIR-Indian Institute of Chemical Technology, Uppal Road, Tarnaka, Hyderabad 500007, India.*

<sup>b</sup>*AcSIR, CSIR-Indian Institute of Chemical Technology, Uppal Road, Tarnaka, Hyderabad 500007, India.*

<sup>c</sup>*Natural Products Chemistry Division, CSIR-Indian Institute of Chemical Technology, Hyderabad-500007, India.*

<sup>d</sup>*Centre for X-ray Crystallography CSIR-Indian Institute of Chemical Technology Hyderabad-500007, India,*

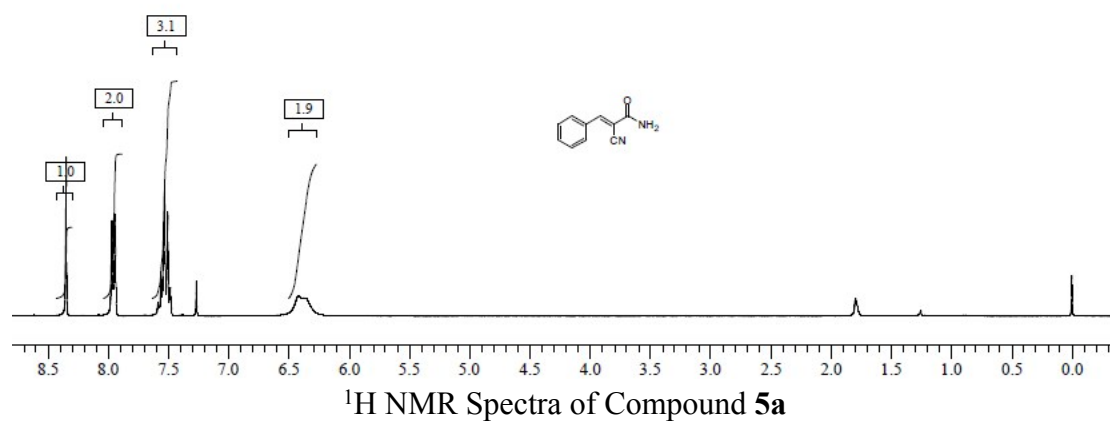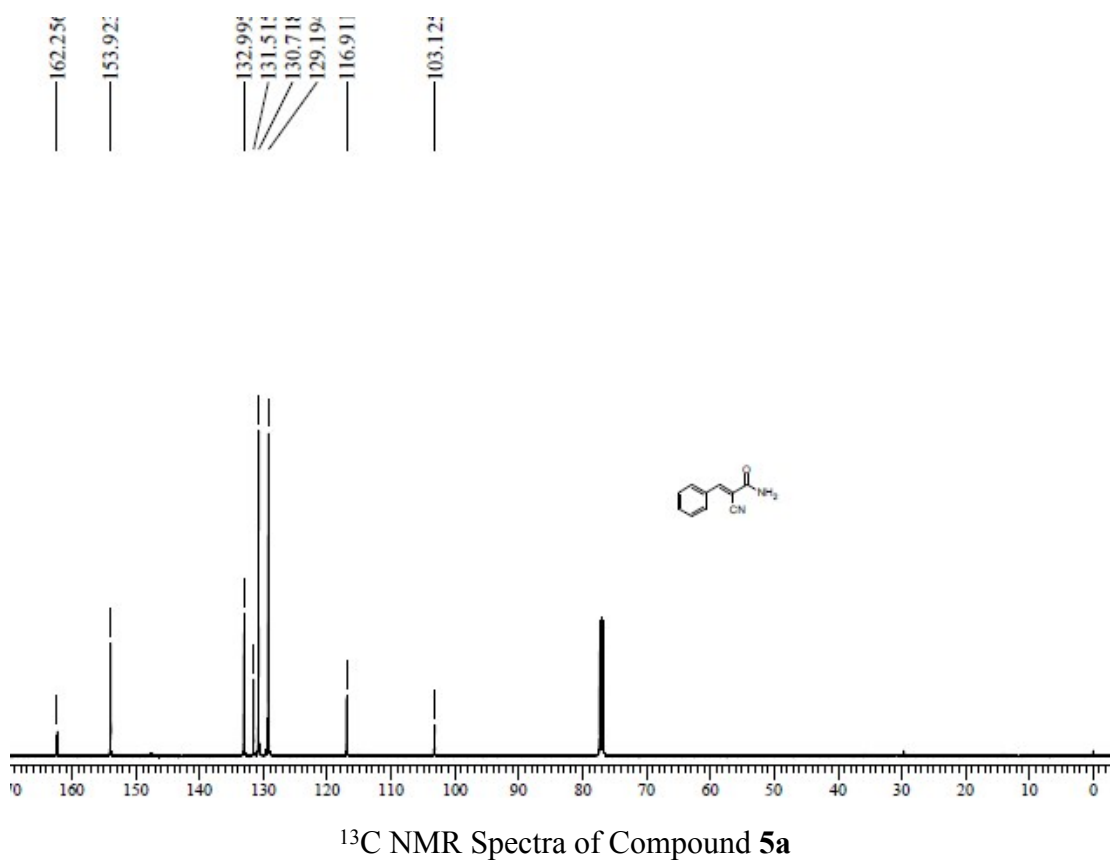

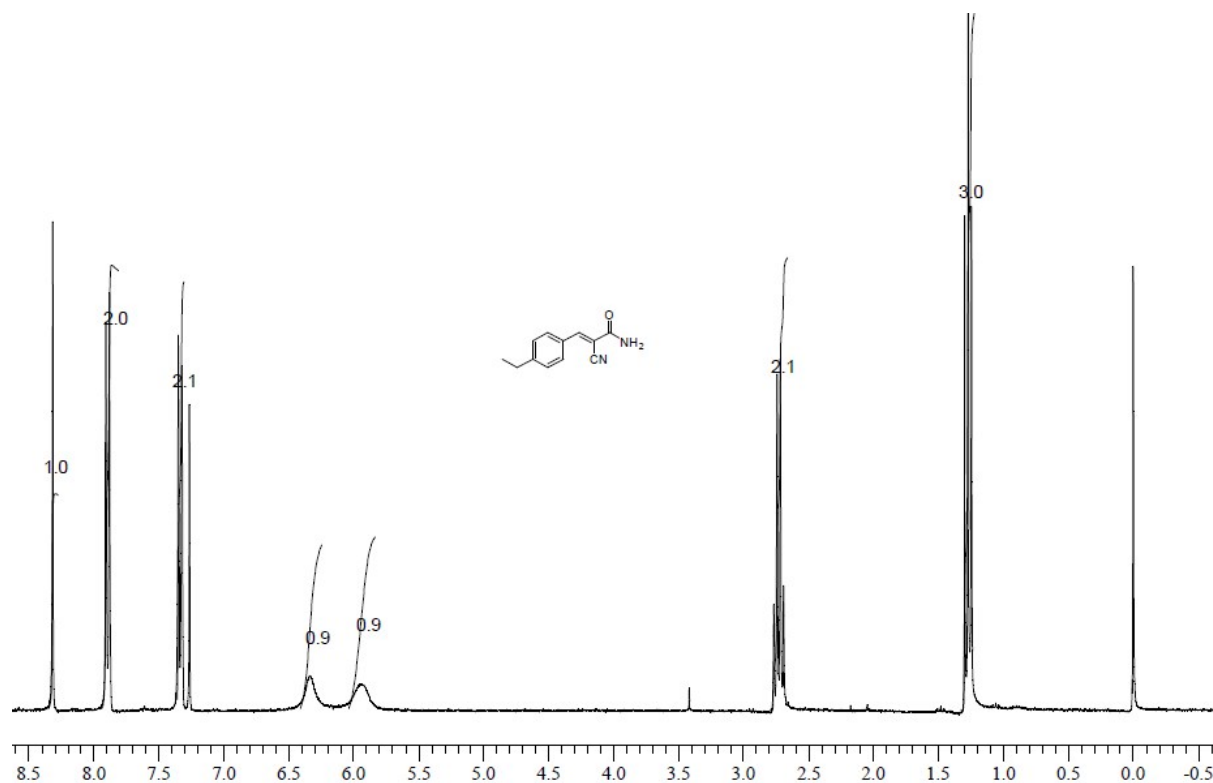

<sup>1</sup>H NMR Spectra of Compound **5b**

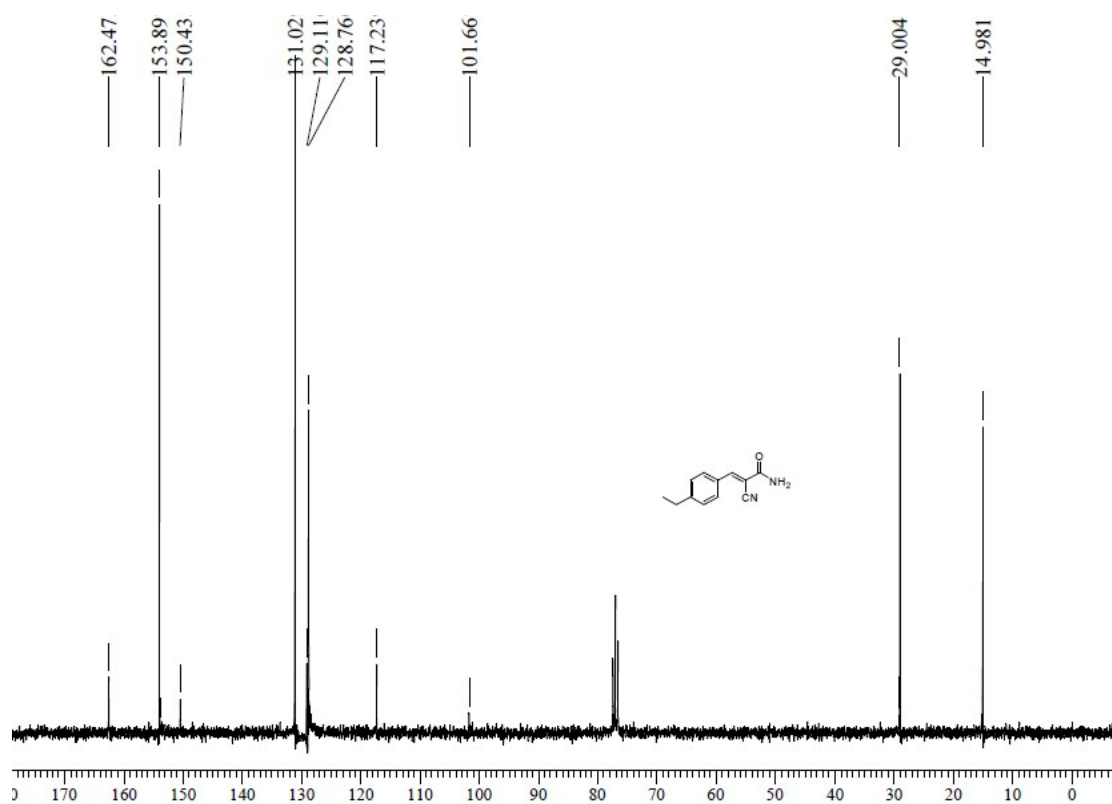

<sup>13</sup>C NMR Spectra of Compound **5b**

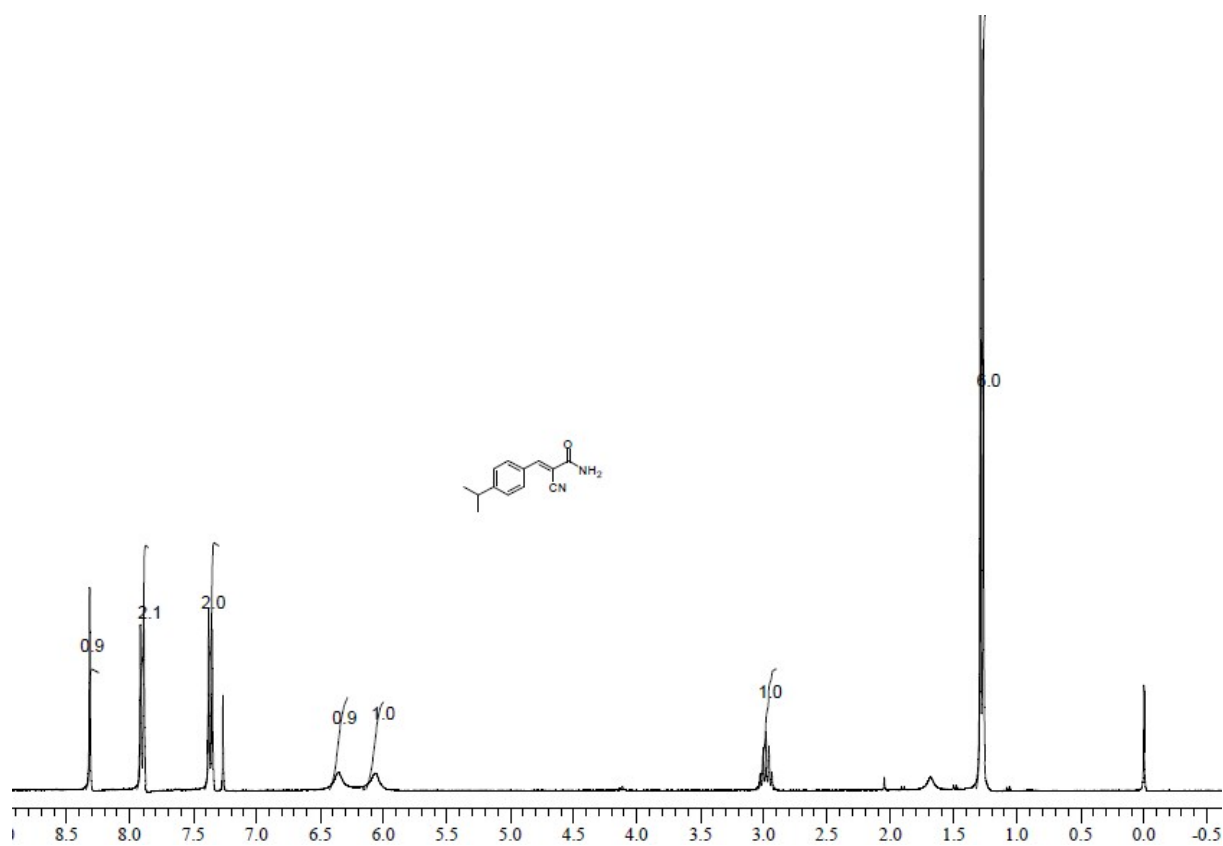

<sup>1</sup>H NMR Spectra of Compound **5c**

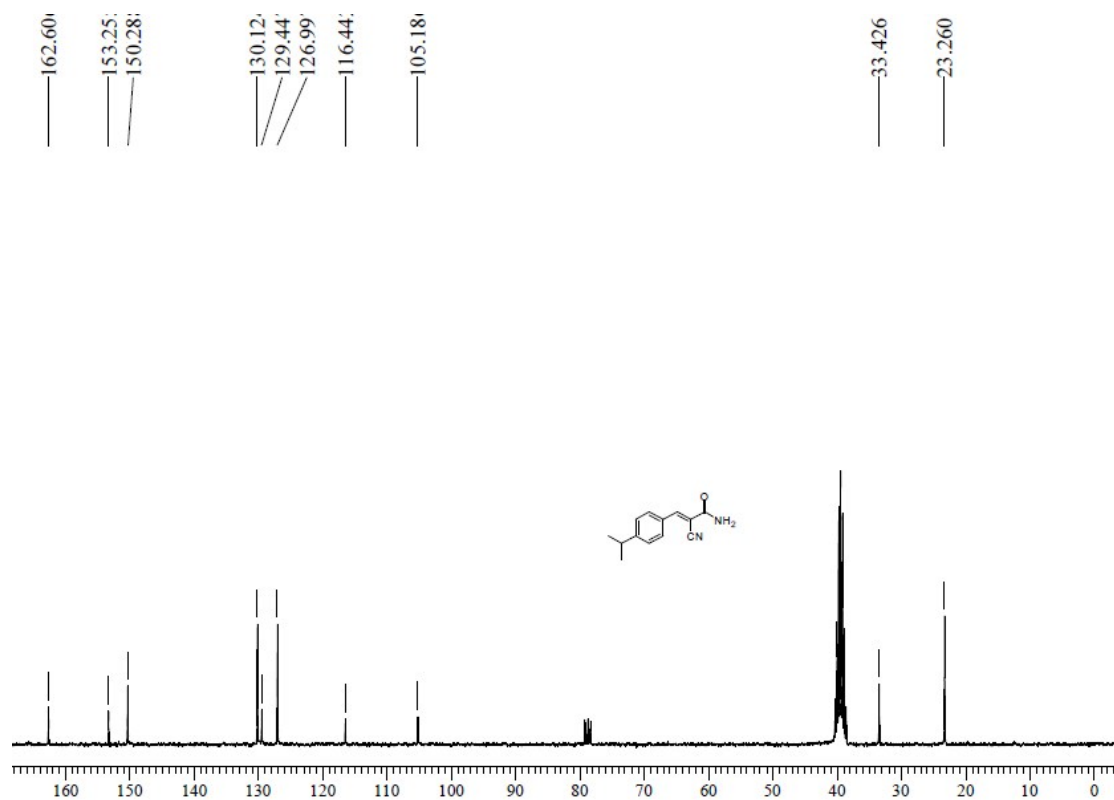

<sup>13</sup>C NMR Spectra of Compound **5c**

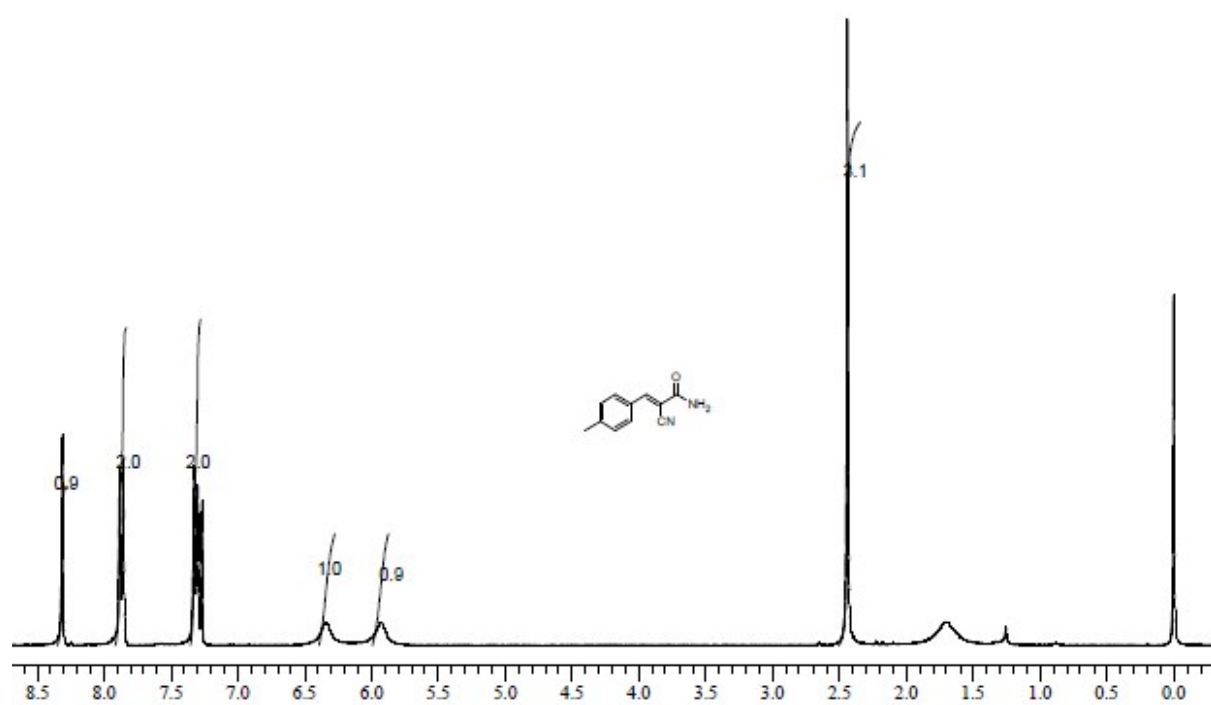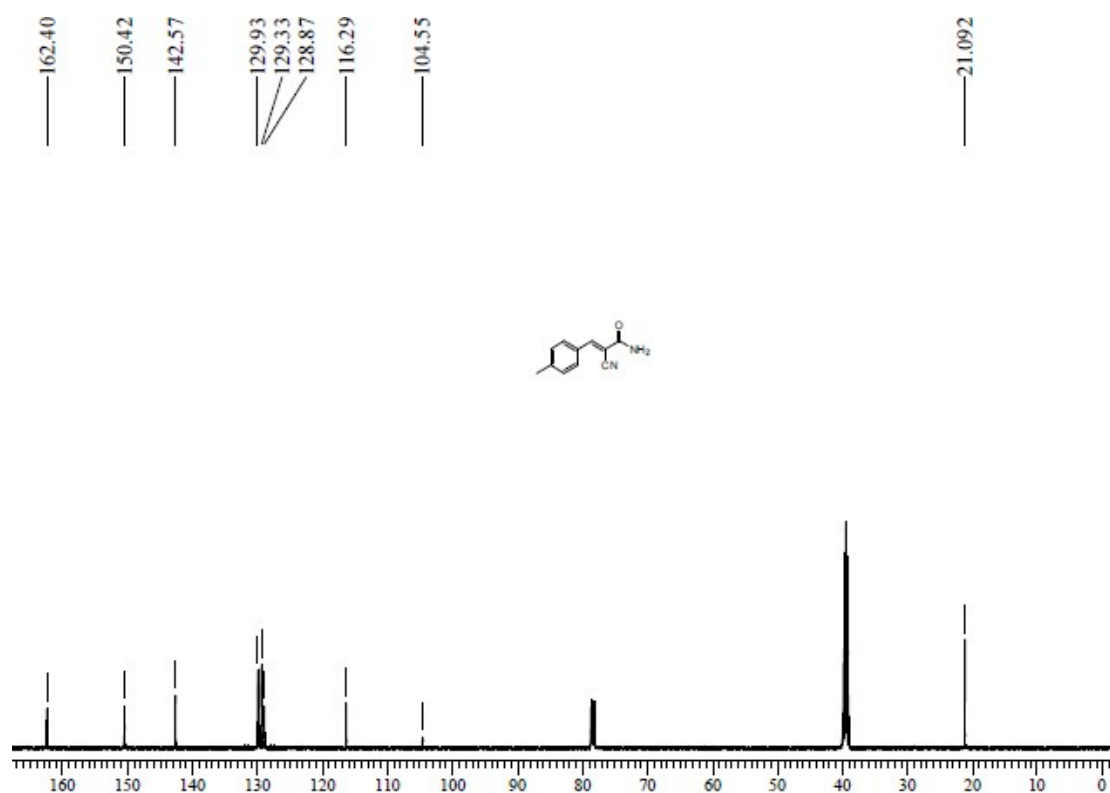

<sup>13</sup>C NMR Spectra of Compound 5d

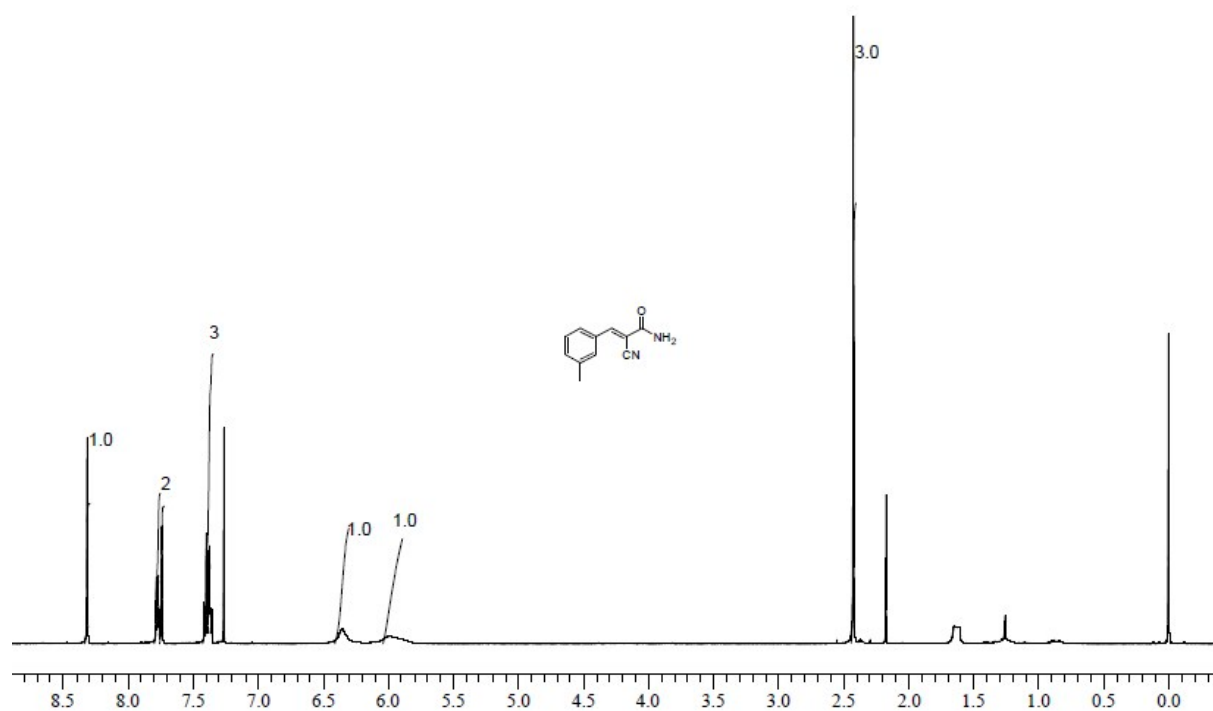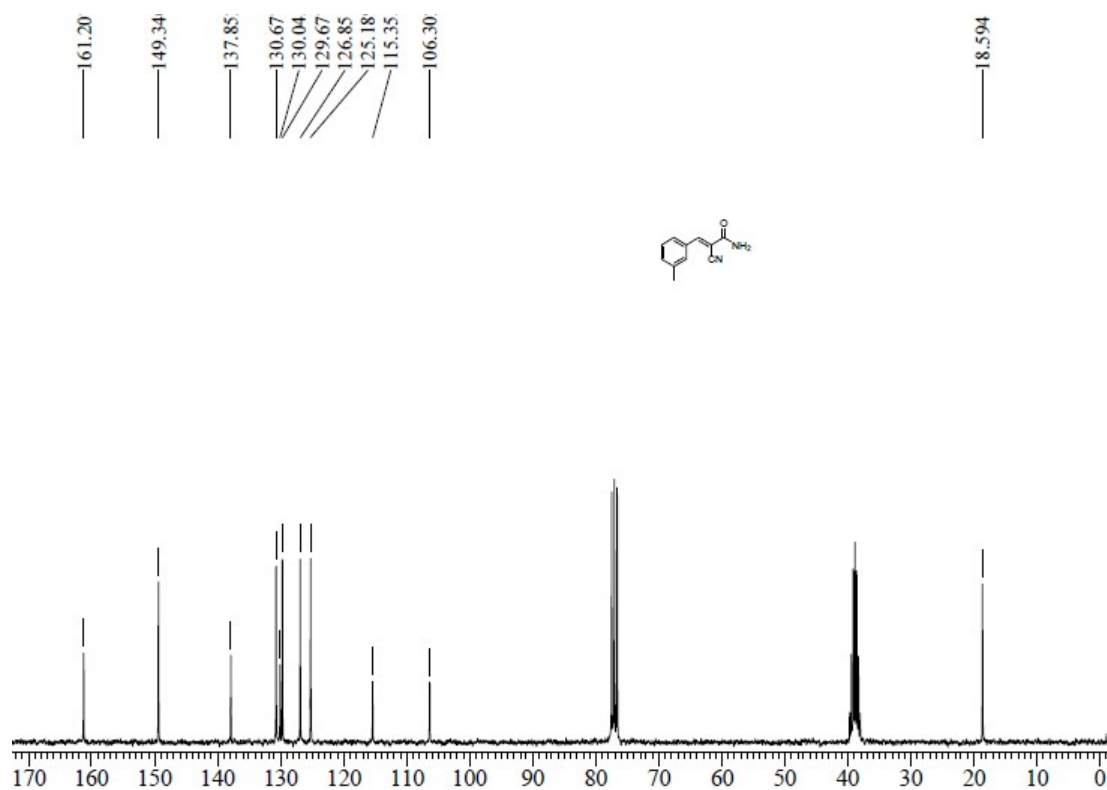

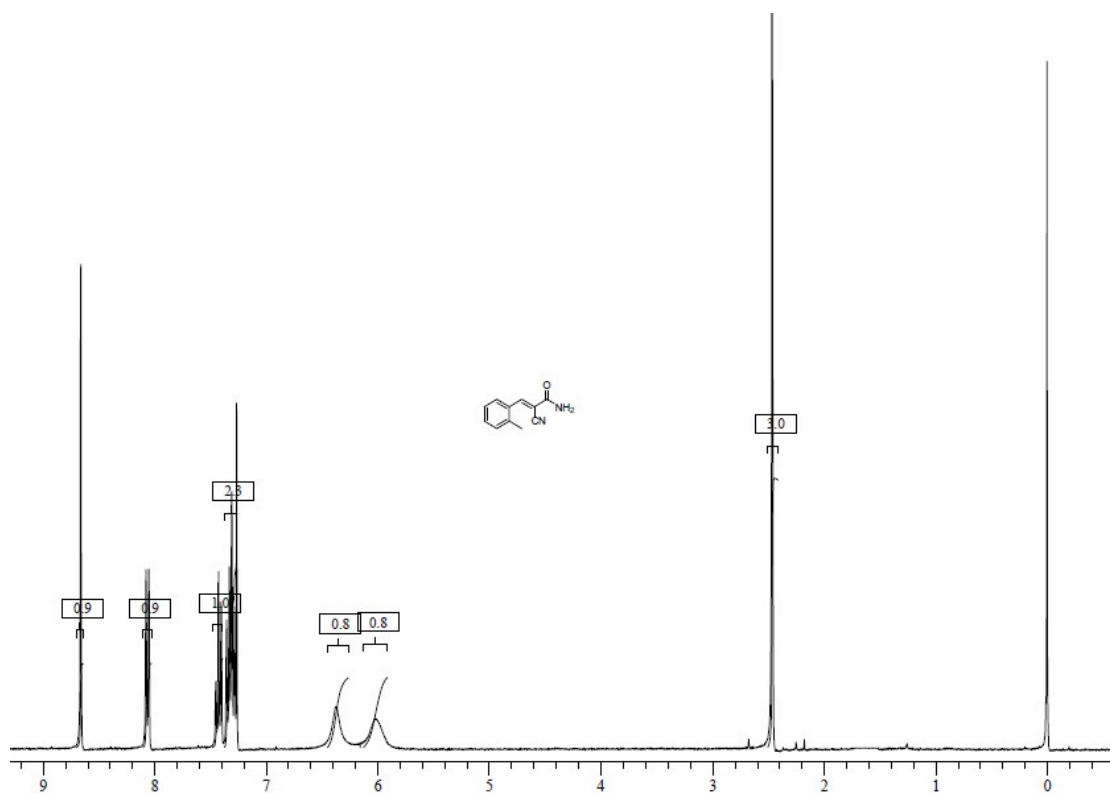

<sup>1</sup>H NMR Spectra of Compound **5f**

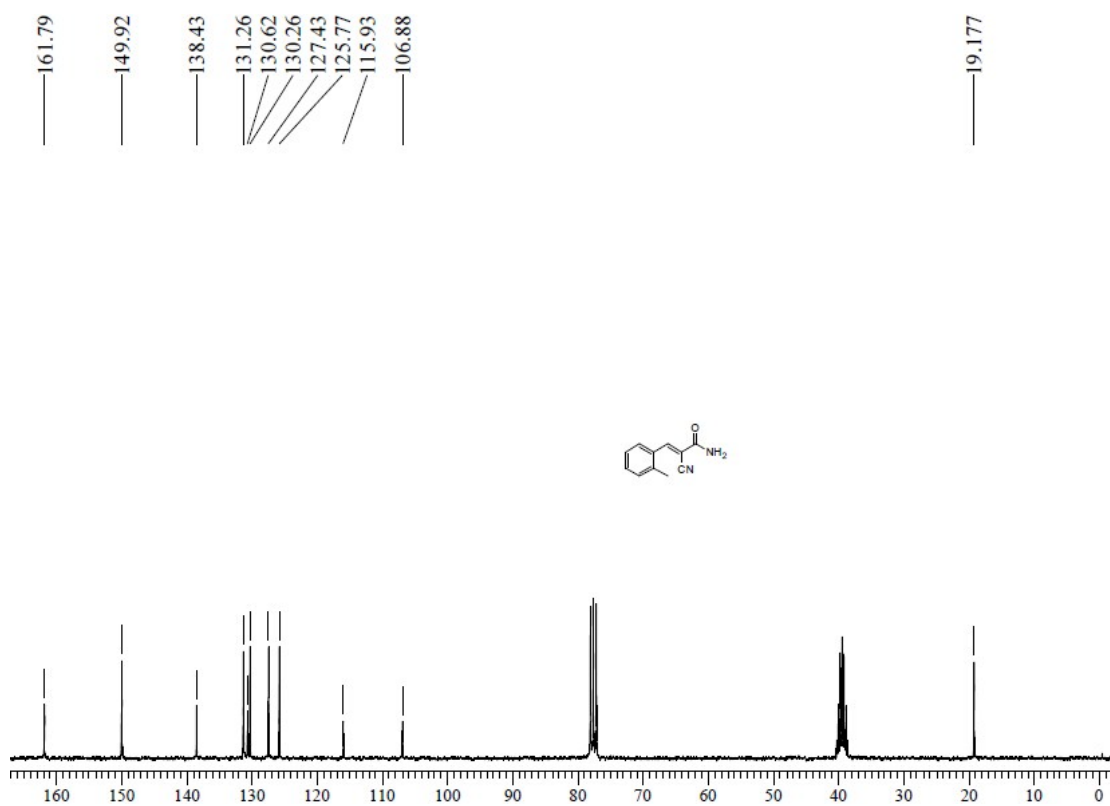

<sup>13</sup>C NMR Spectra of Compound **5f**

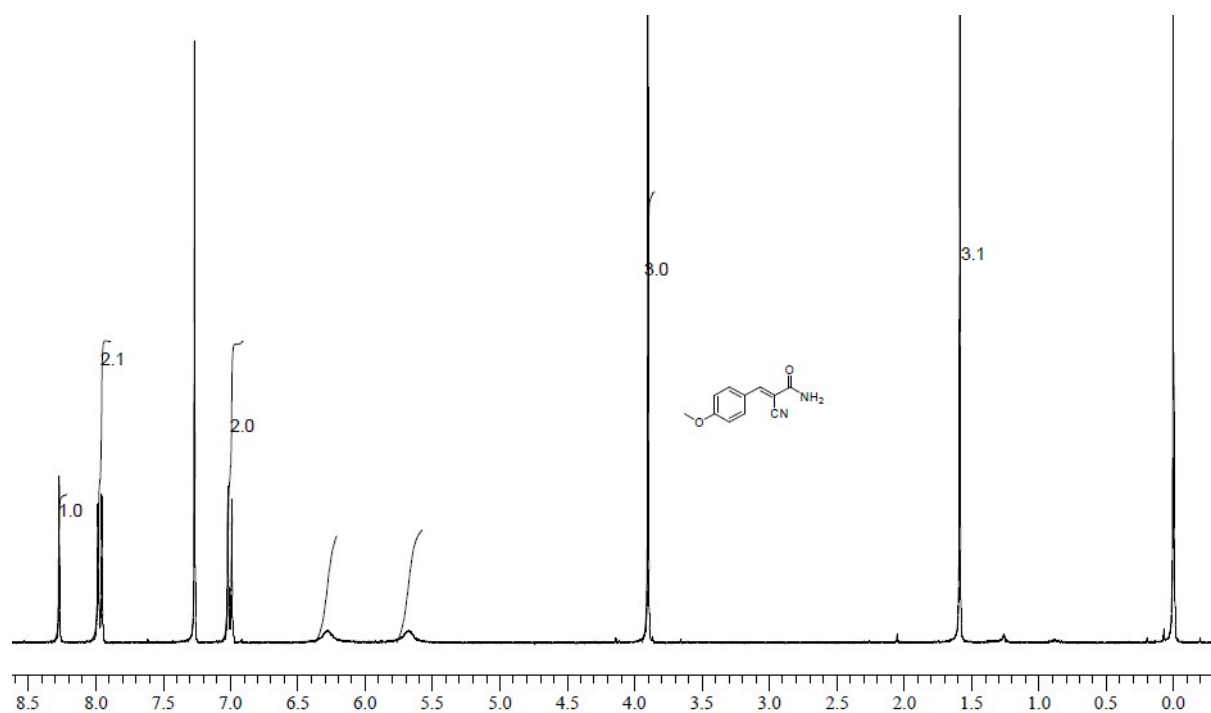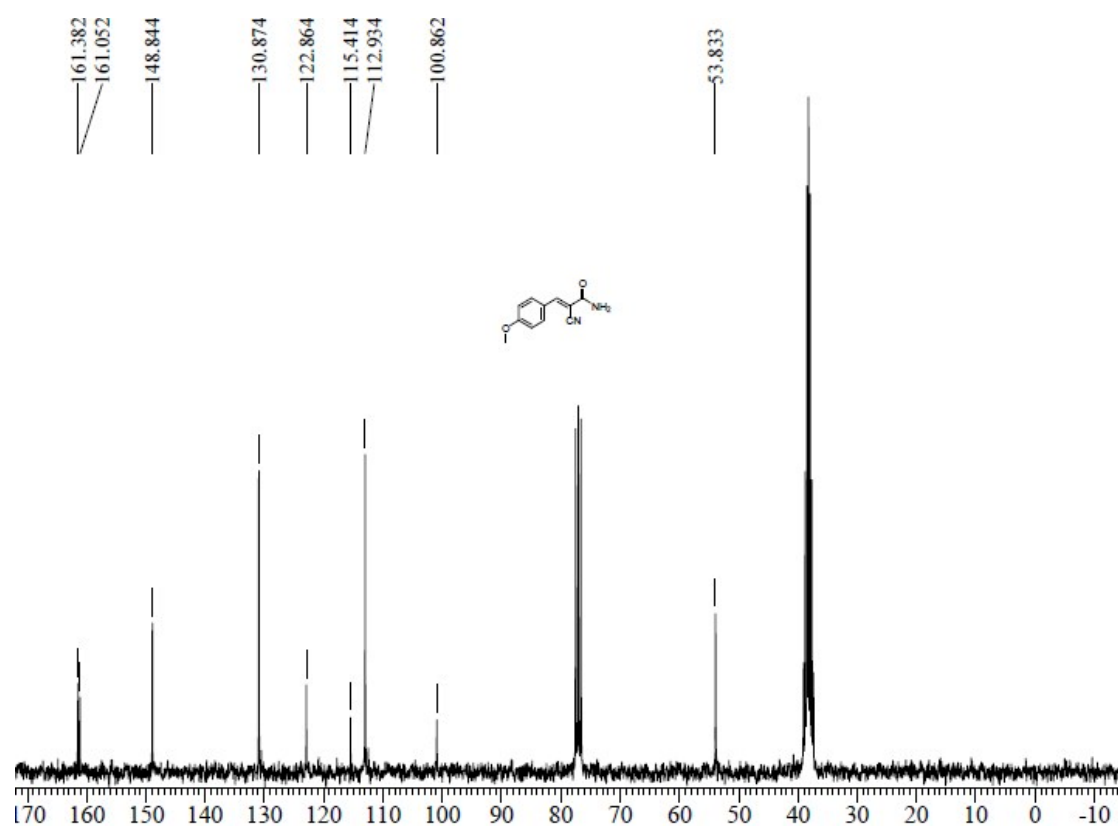

<sup>13</sup>C NMR Spectra of Compound **5g**



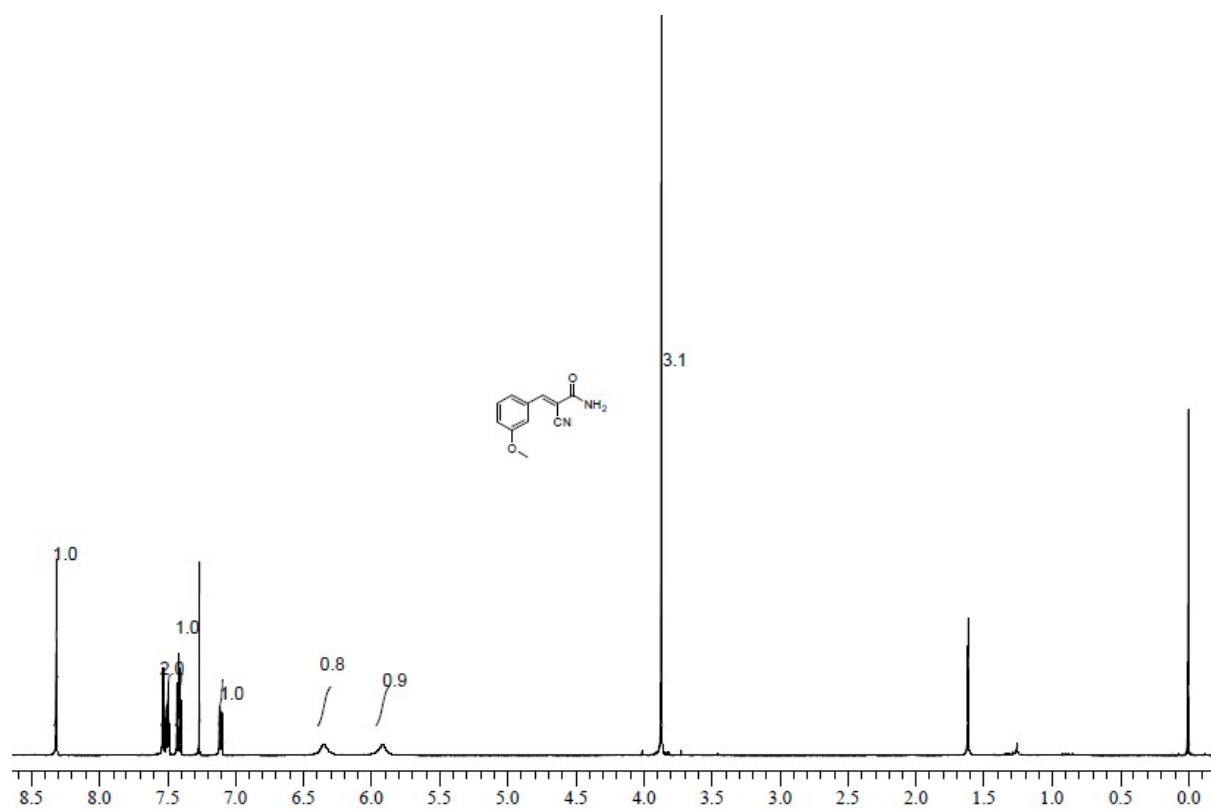

<sup>1</sup>H NMR Spectra of Compound **5h**

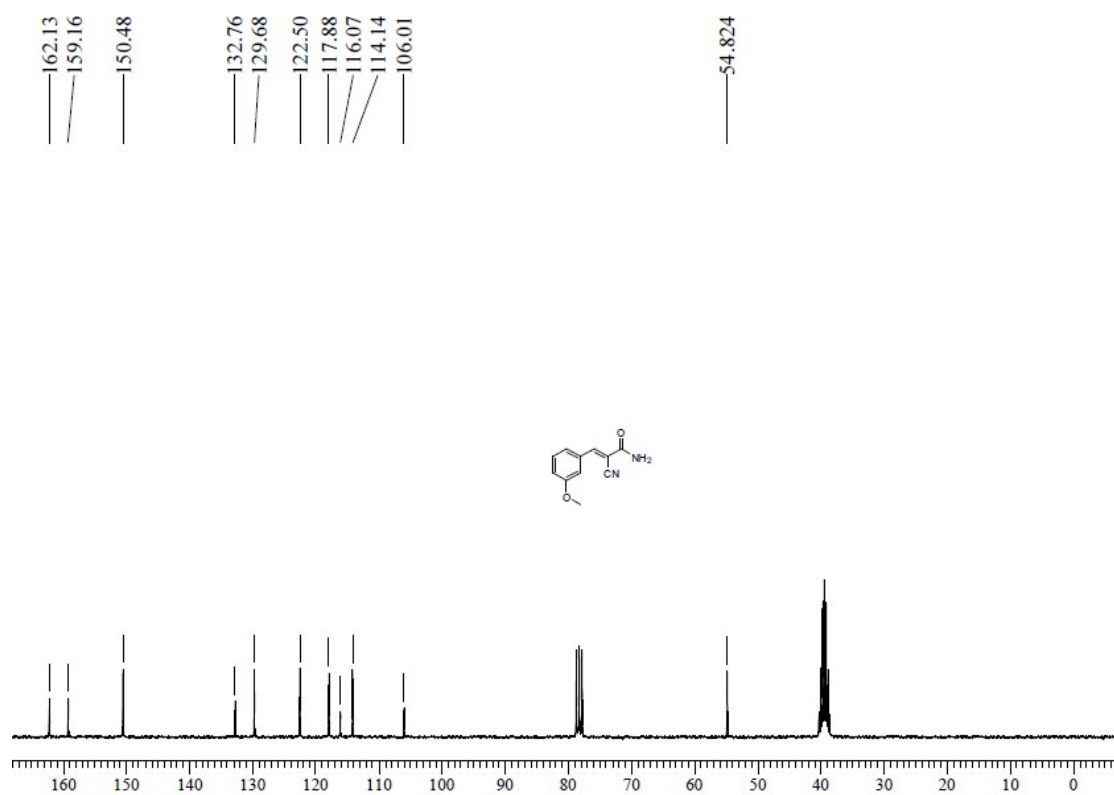

<sup>13</sup>C NMR Spectra of Compound **5h**

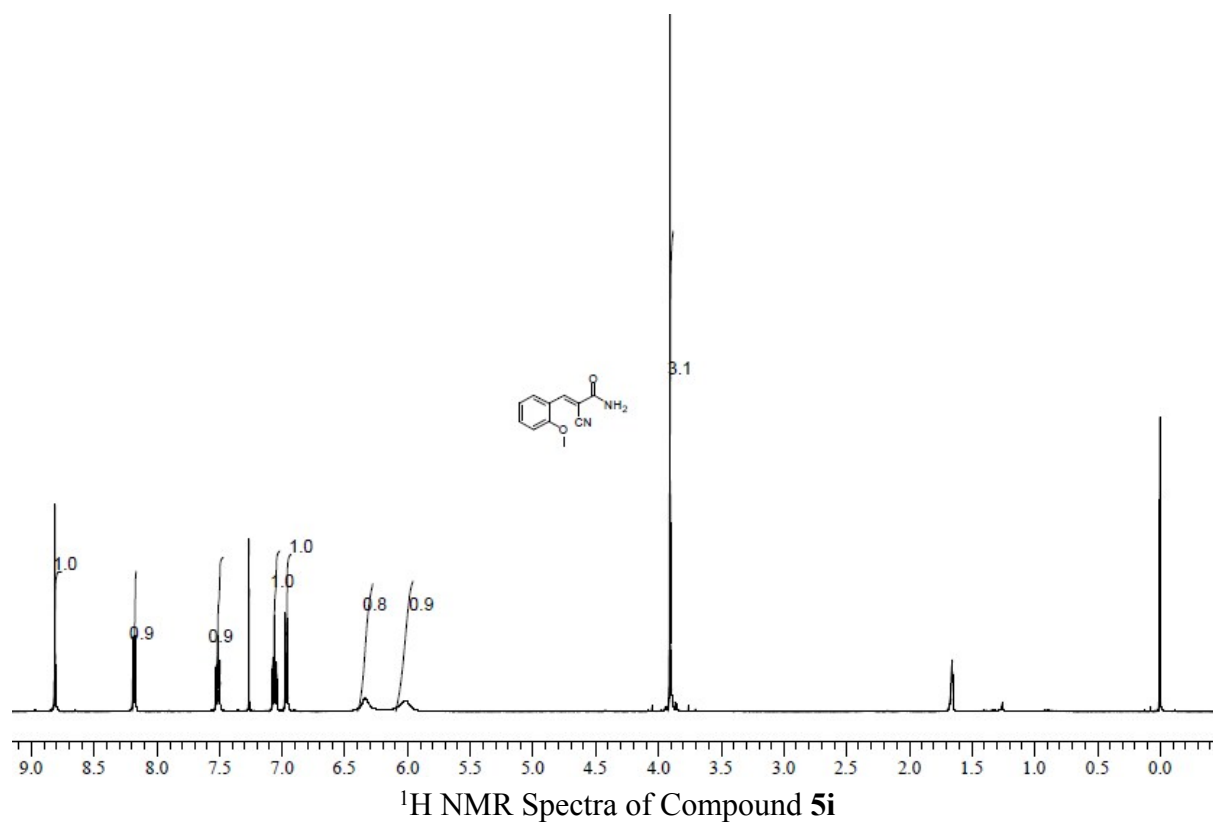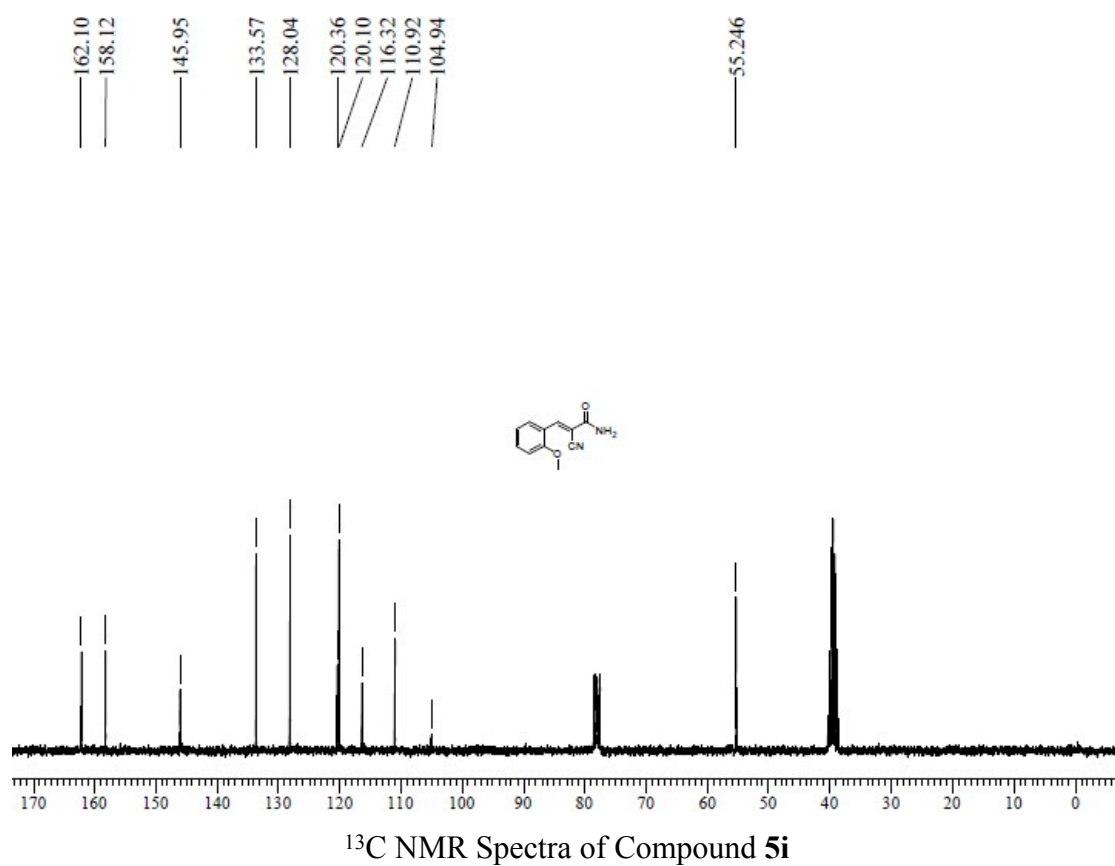

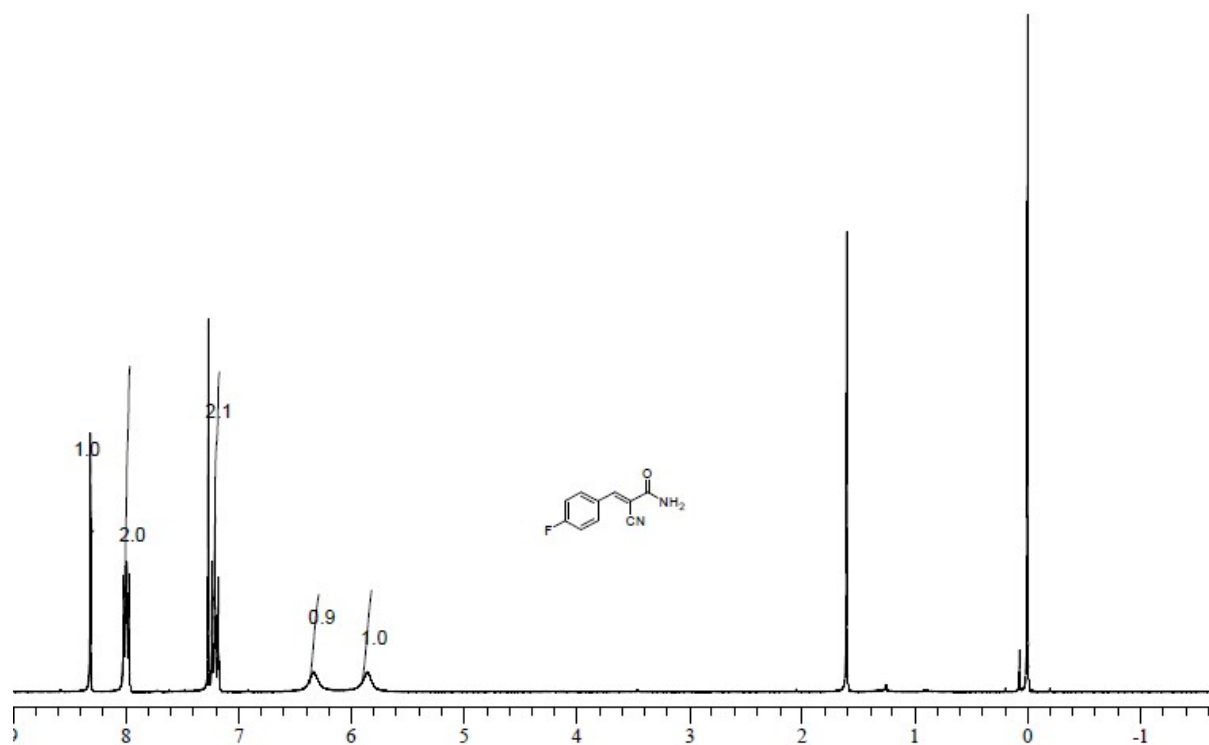

<sup>1</sup>H NMR Spectra of Compound **5j**

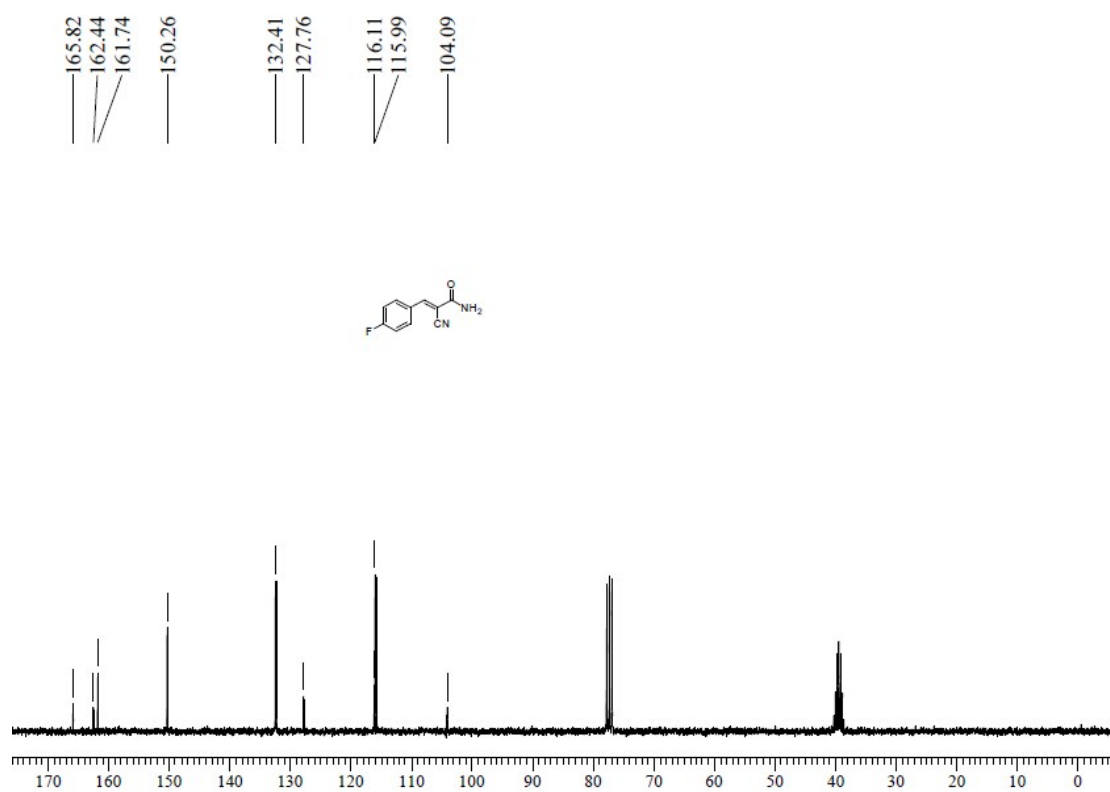

<sup>13</sup>C NMR Spectra of Compound **5j**

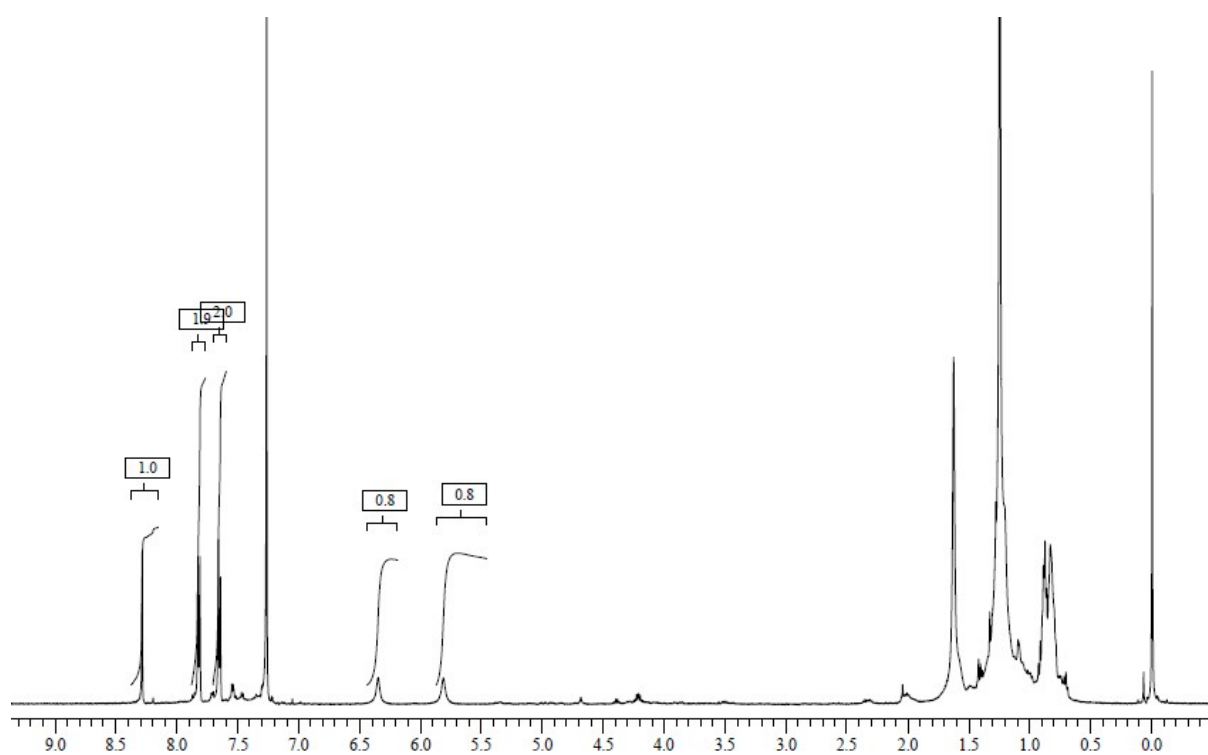

$^1\text{H}$  NMR Spectra of Compound **5k**

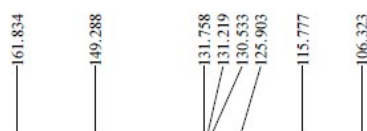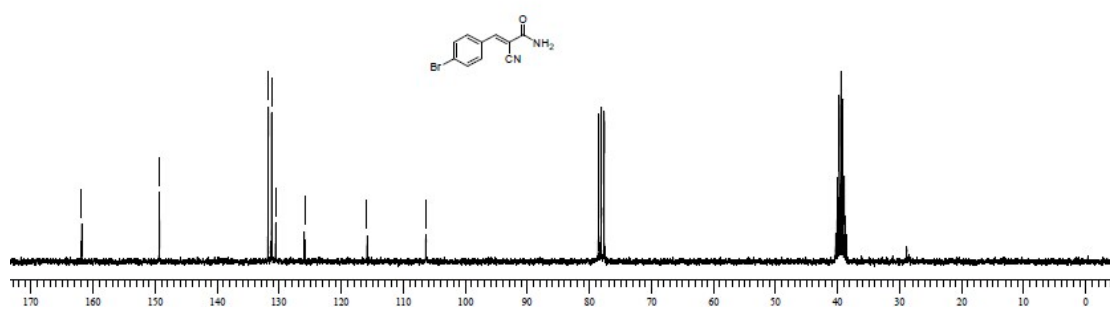

$^{13}\text{C}$  NMR Spectra of Compound **5k**

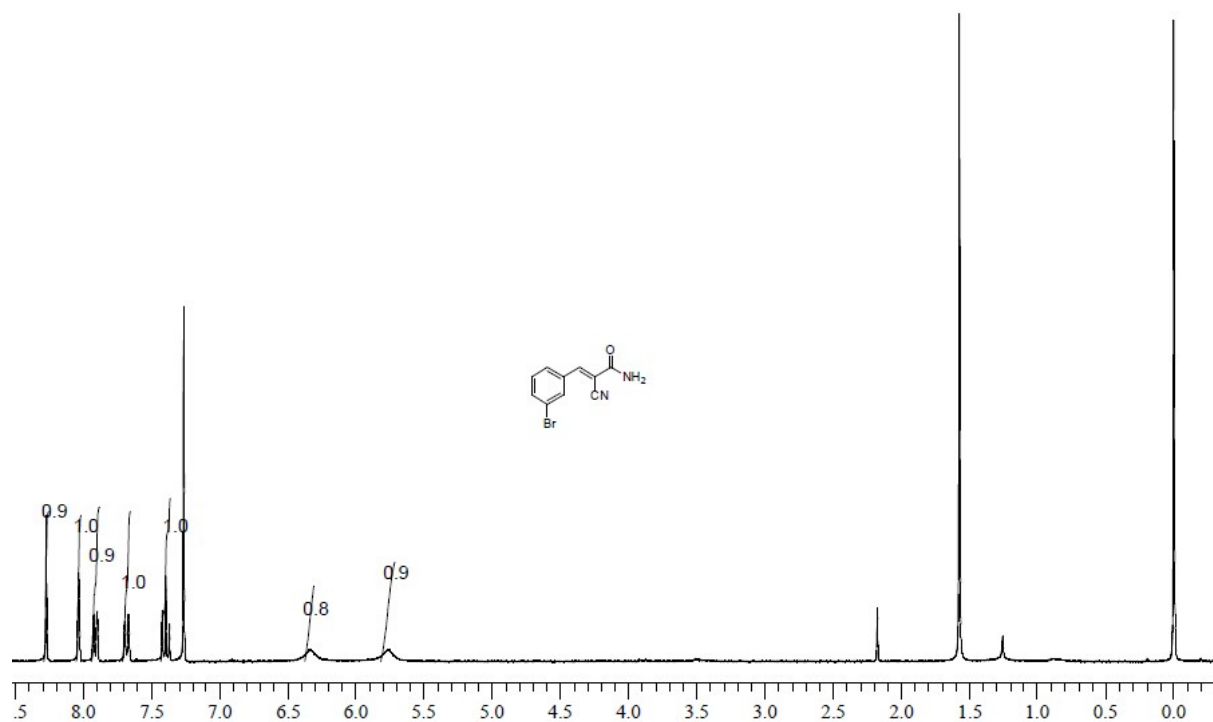

<sup>1</sup>H NMR Spectra of Compound **5I**

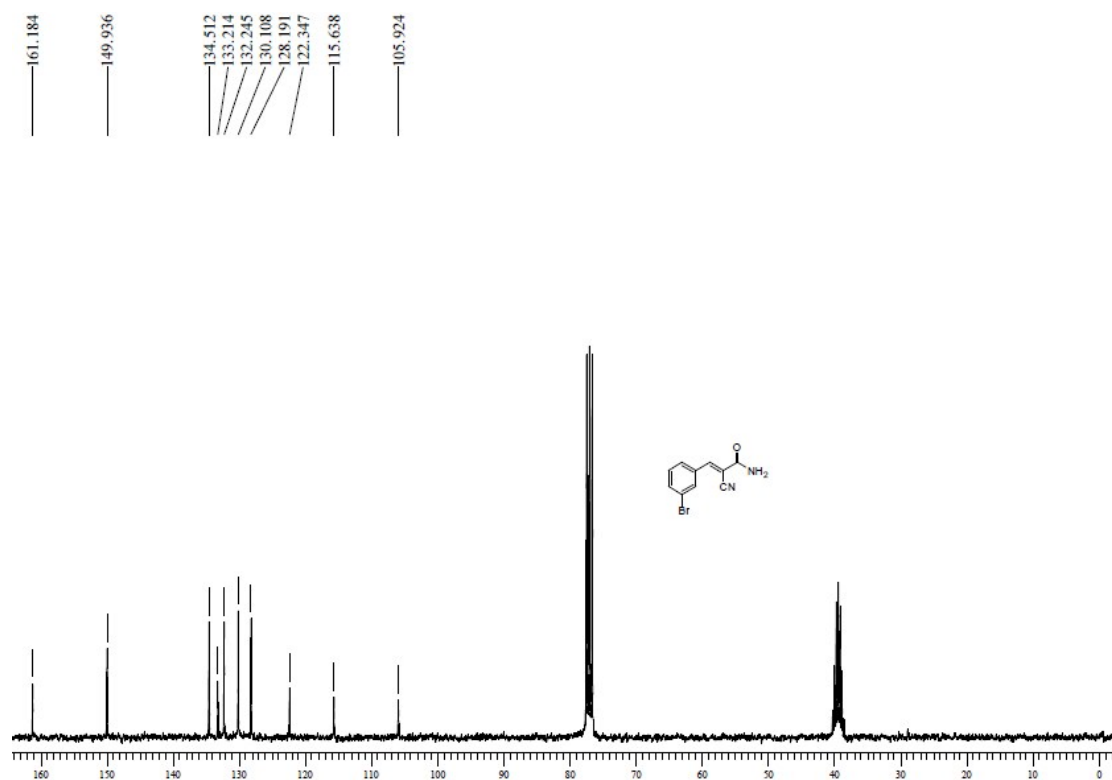

<sup>13</sup>C NMR Spectra of Compound **5I**

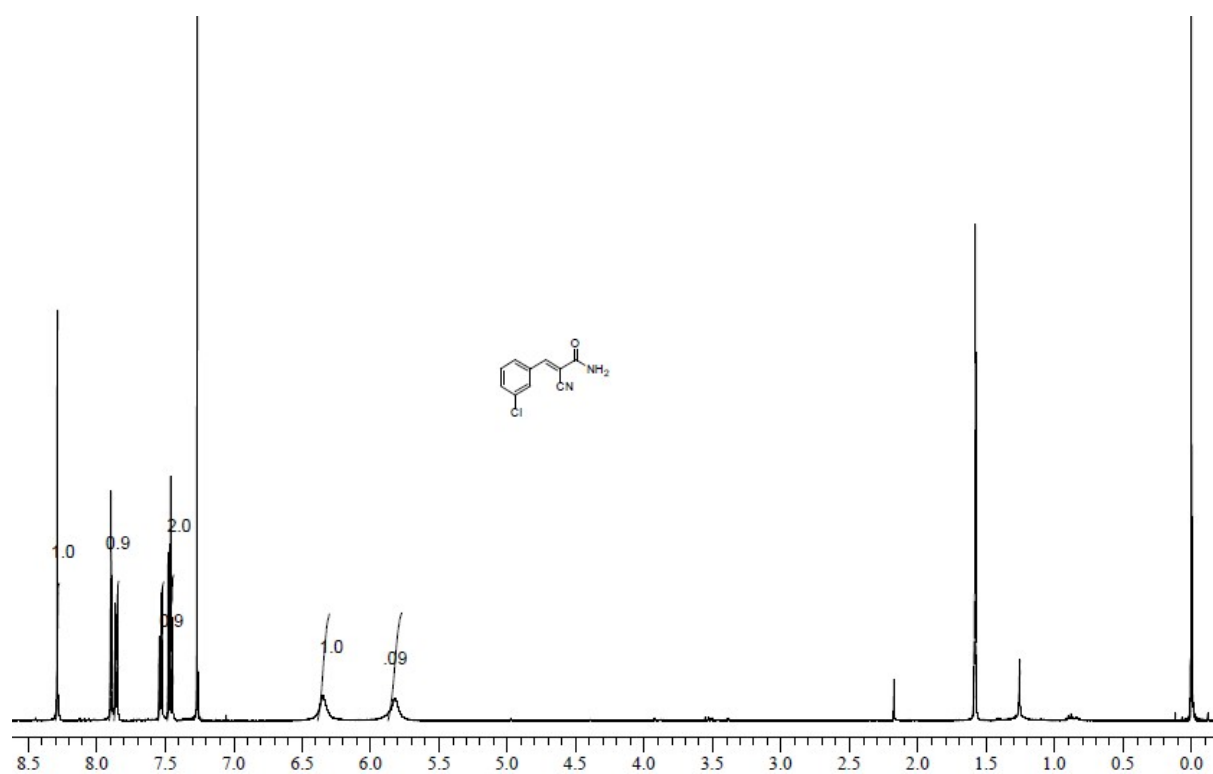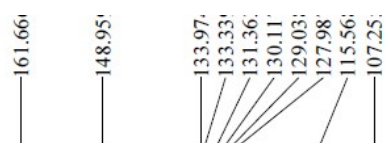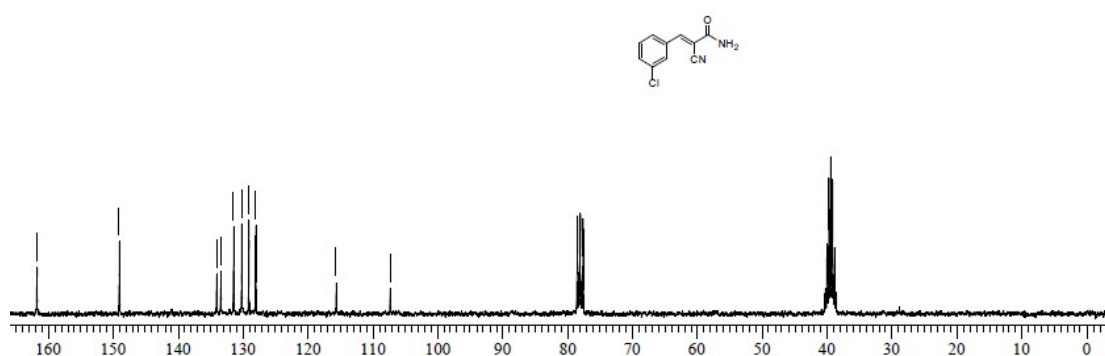

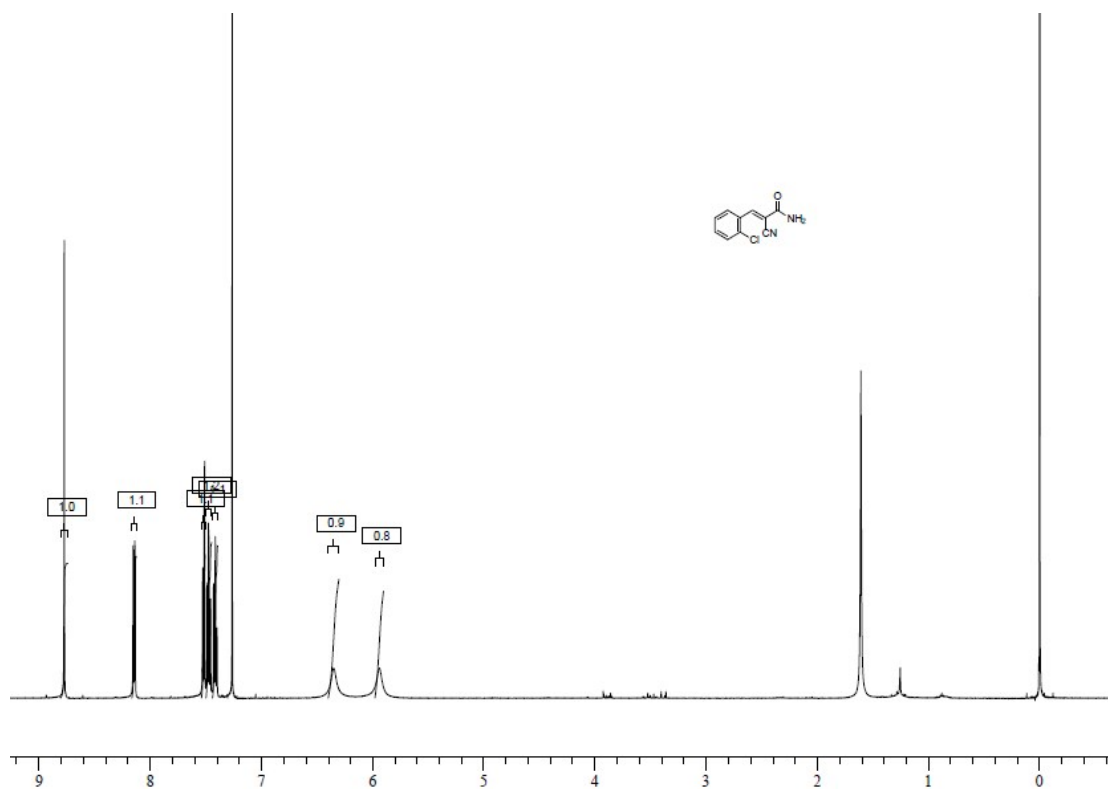

<sup>1</sup>H NMR Spectra of Compound **5n**

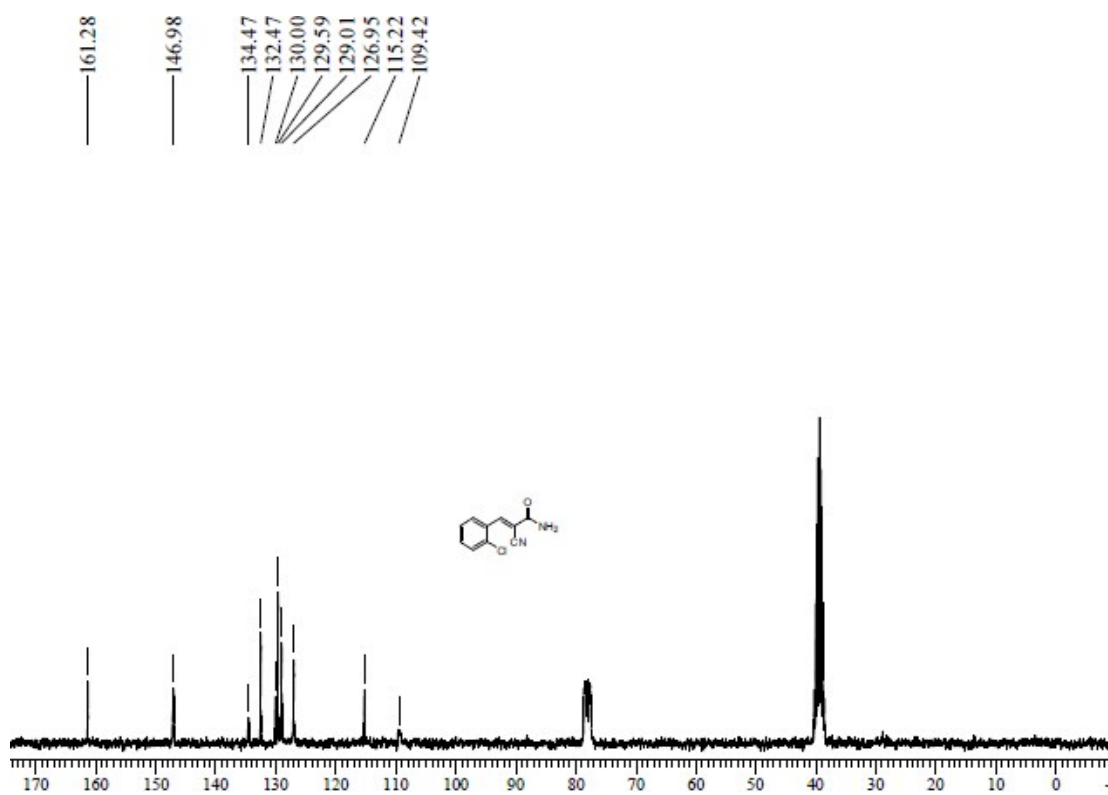

<sup>13</sup>C NMR Spectra of Compound **5n**

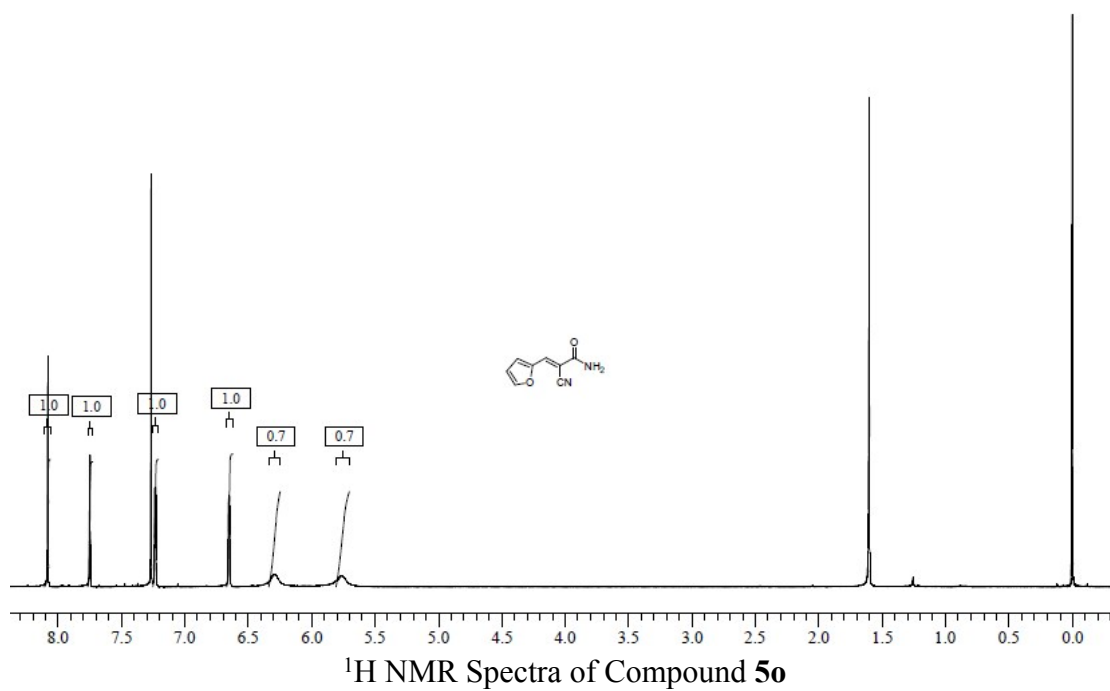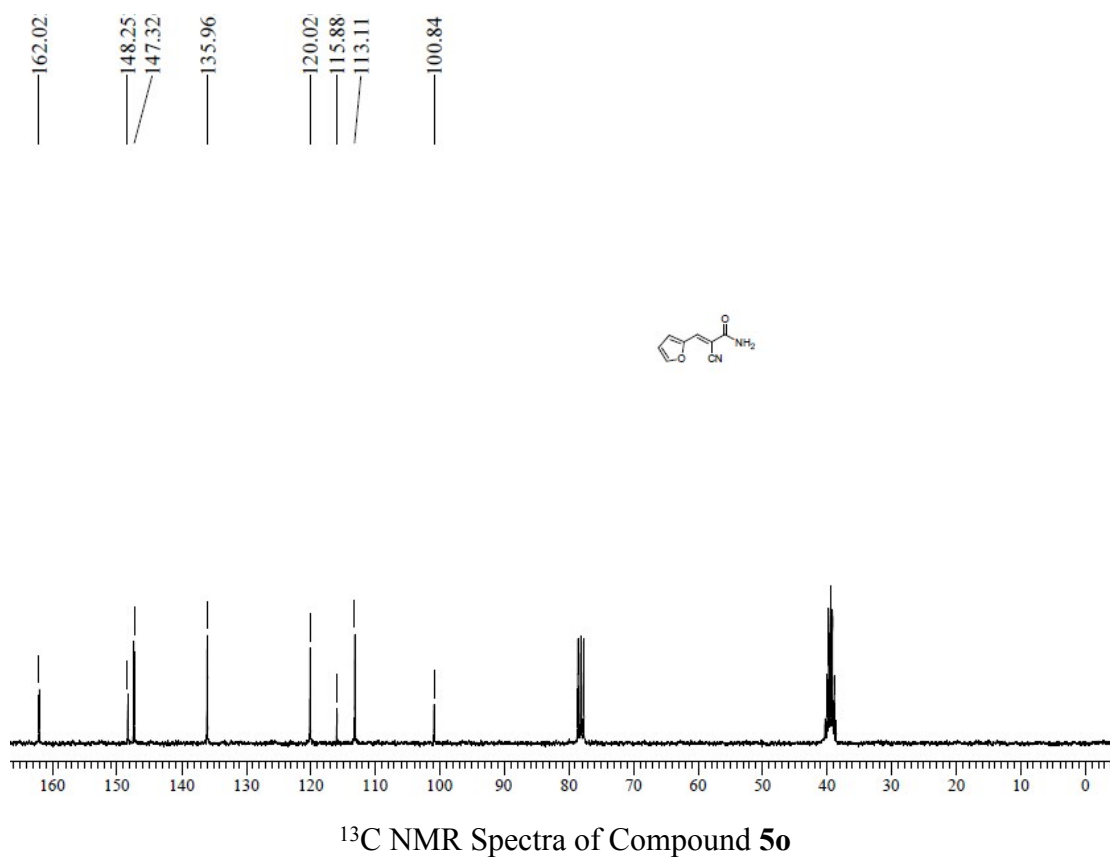



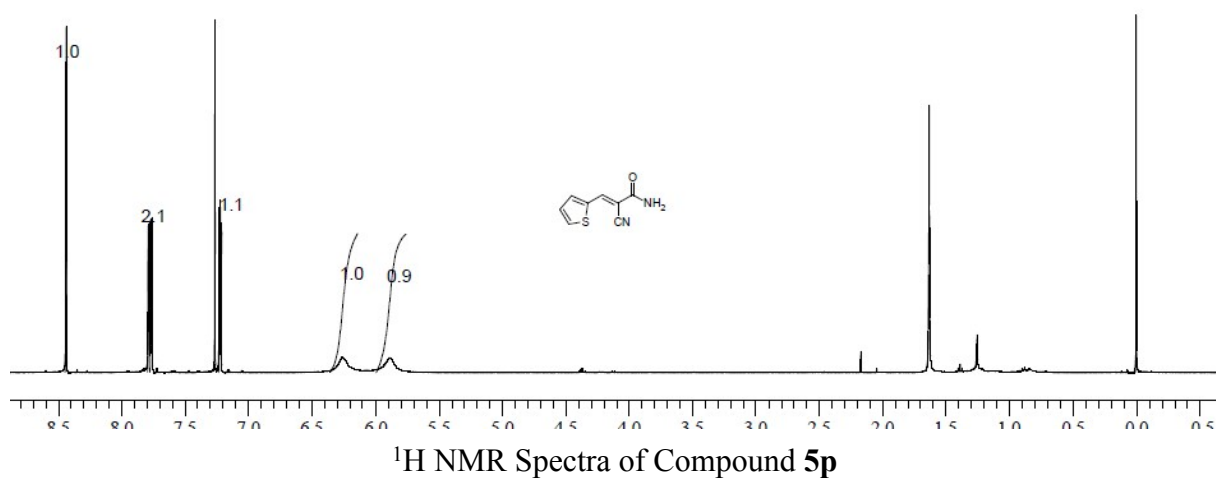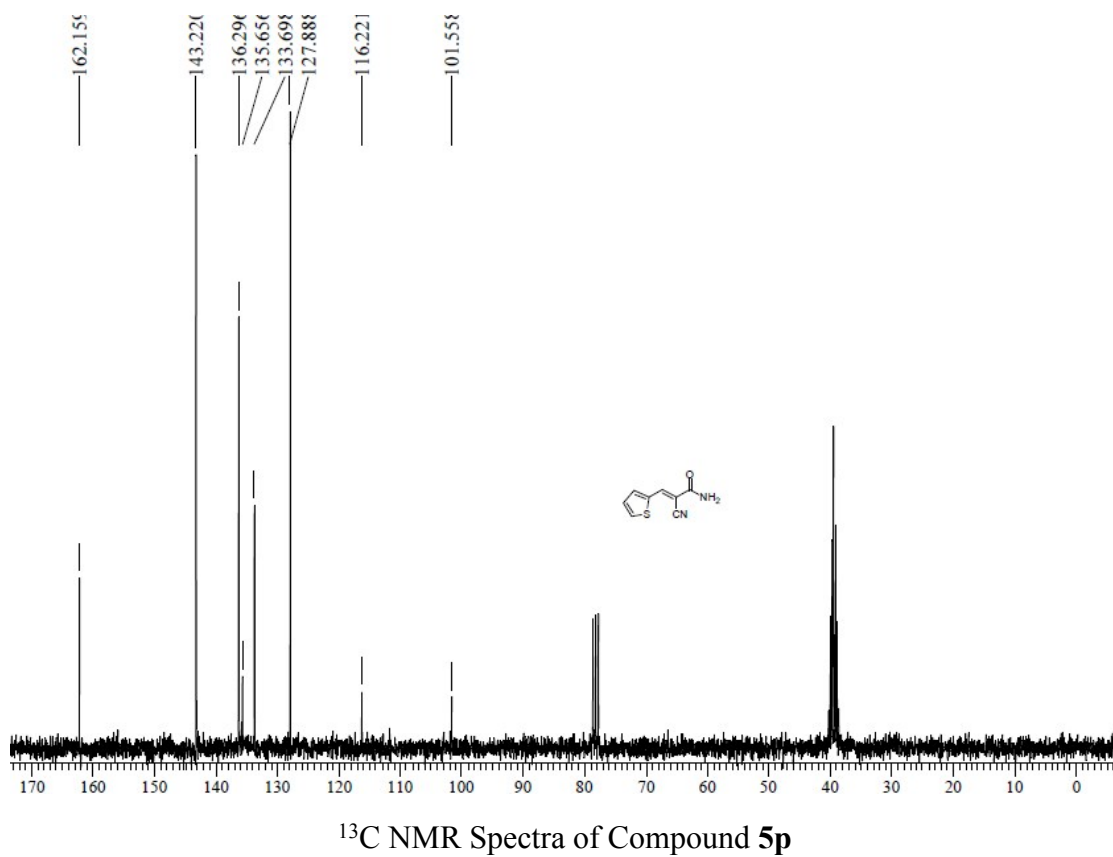

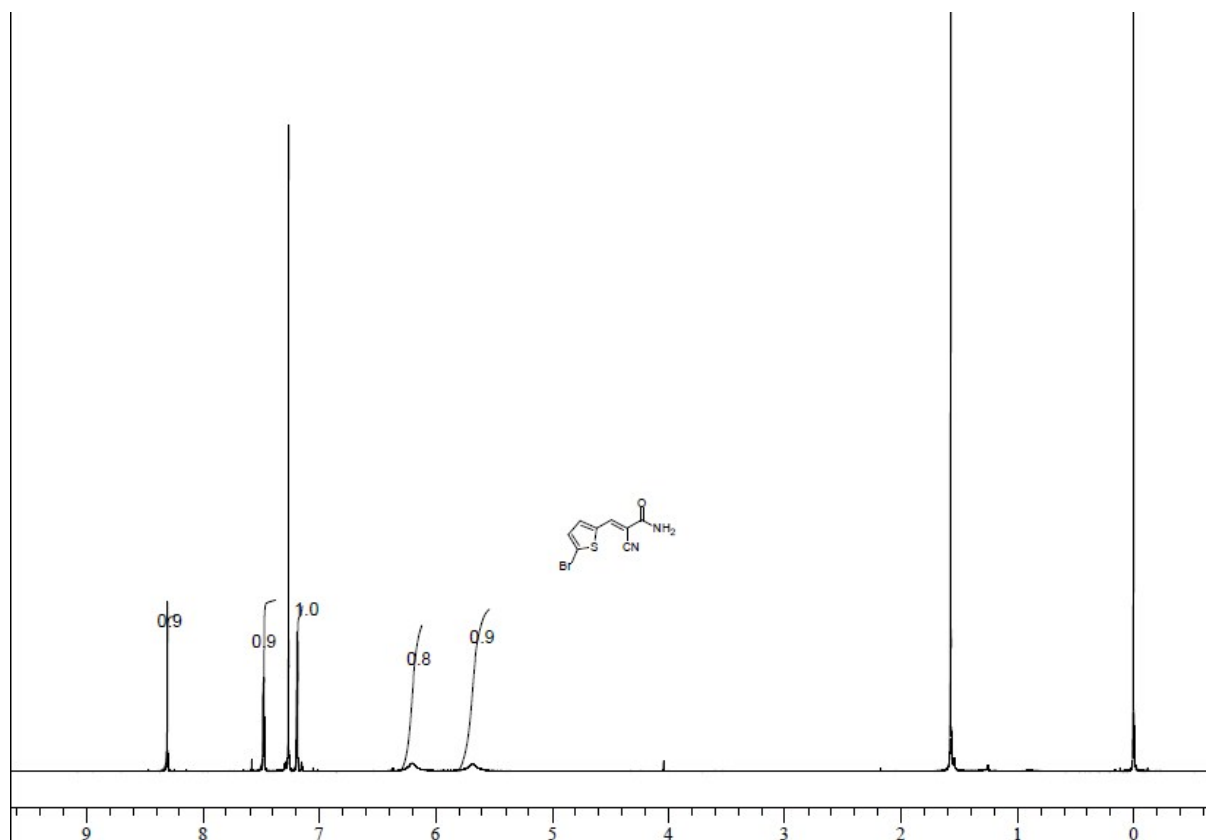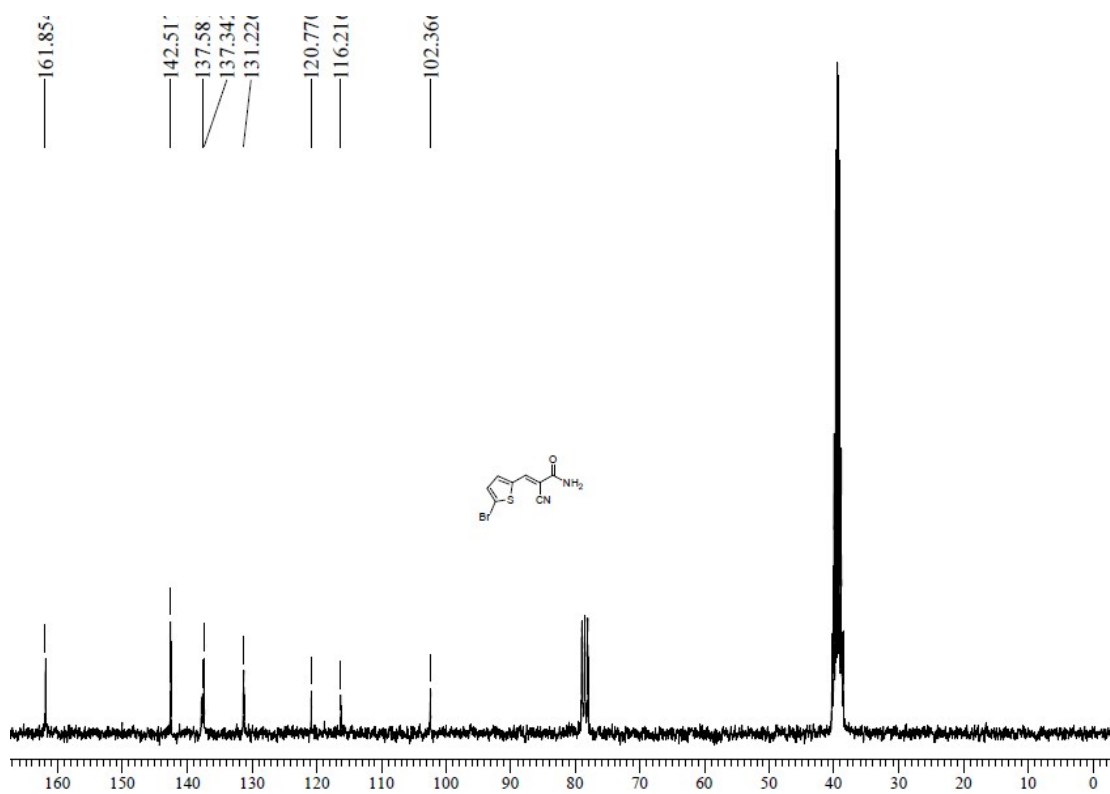

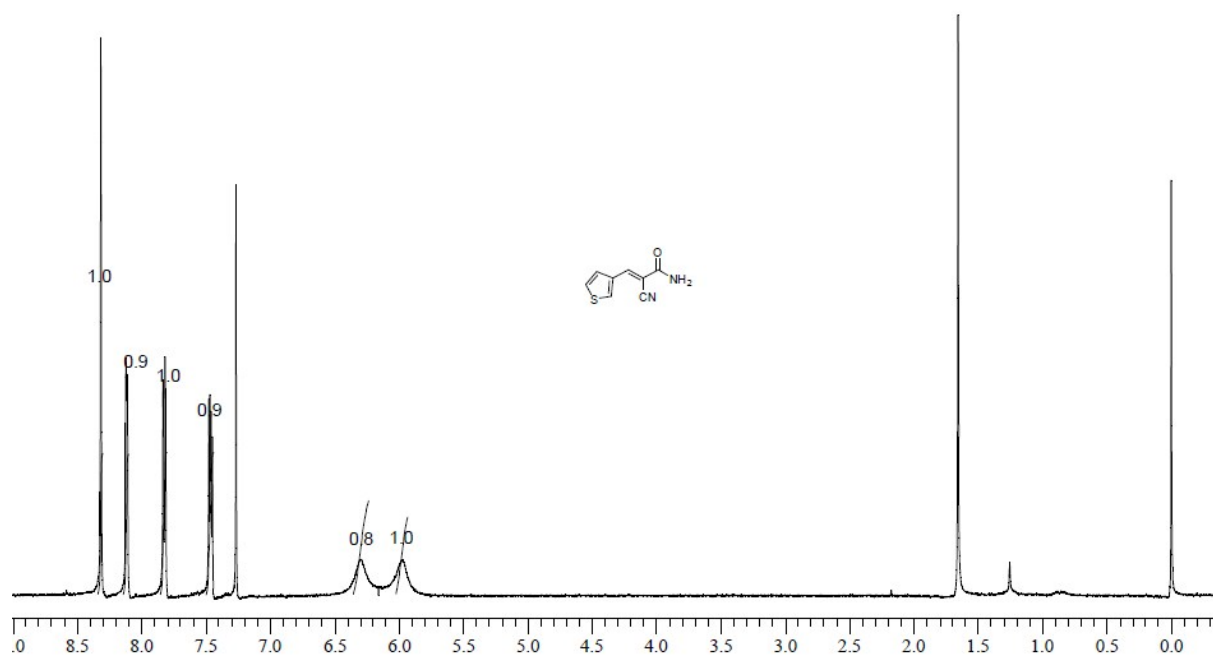

<sup>1</sup>H NMR Spectra of Compound **5r**

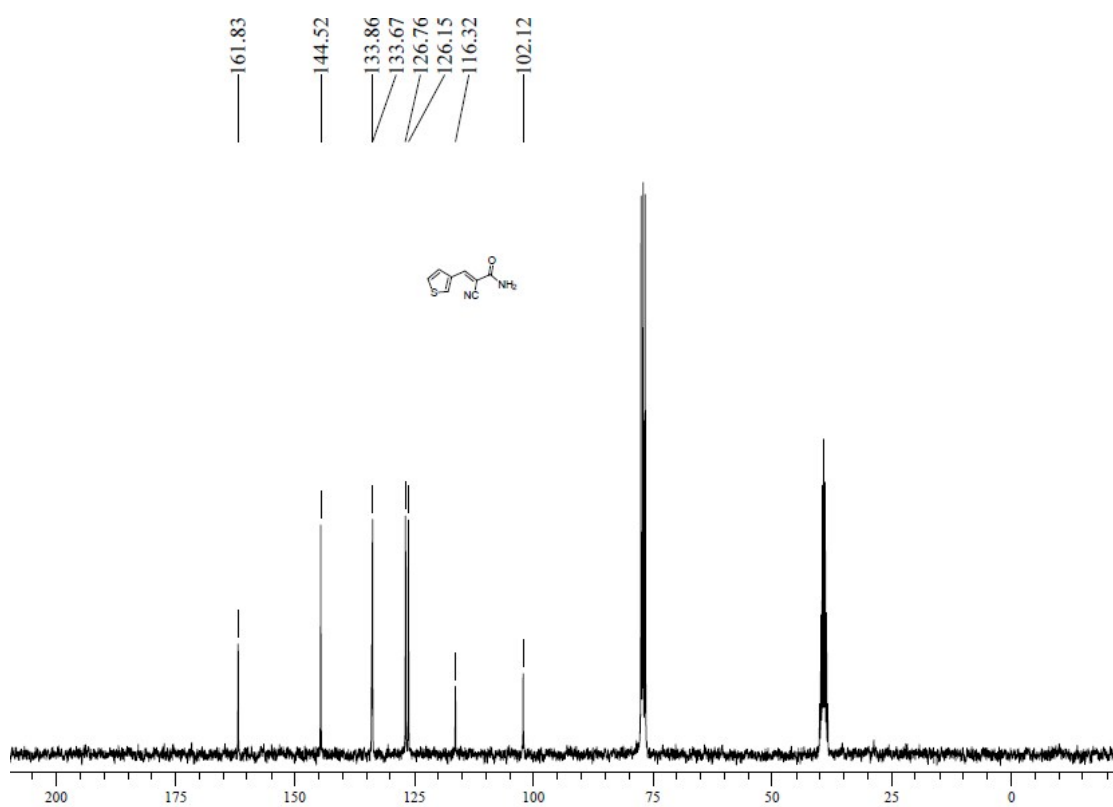

<sup>13</sup>C NMR Spectra of Compound **5r**

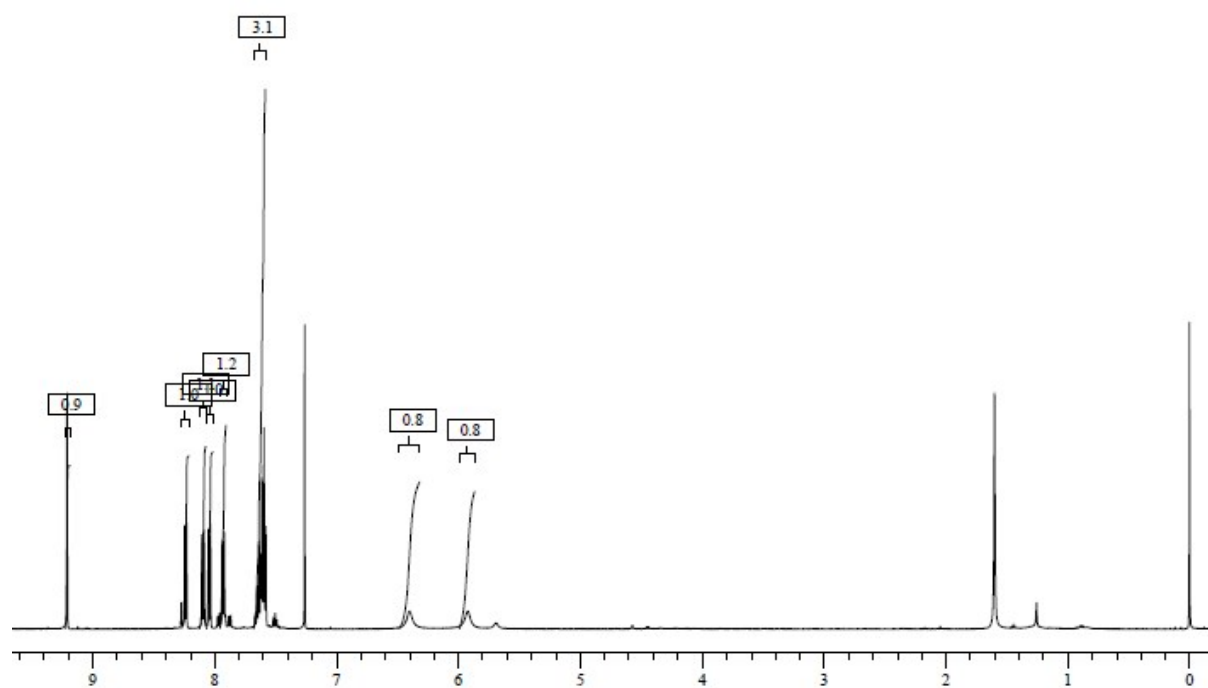

<sup>1</sup>H NMR Spectra of Compound **5s**

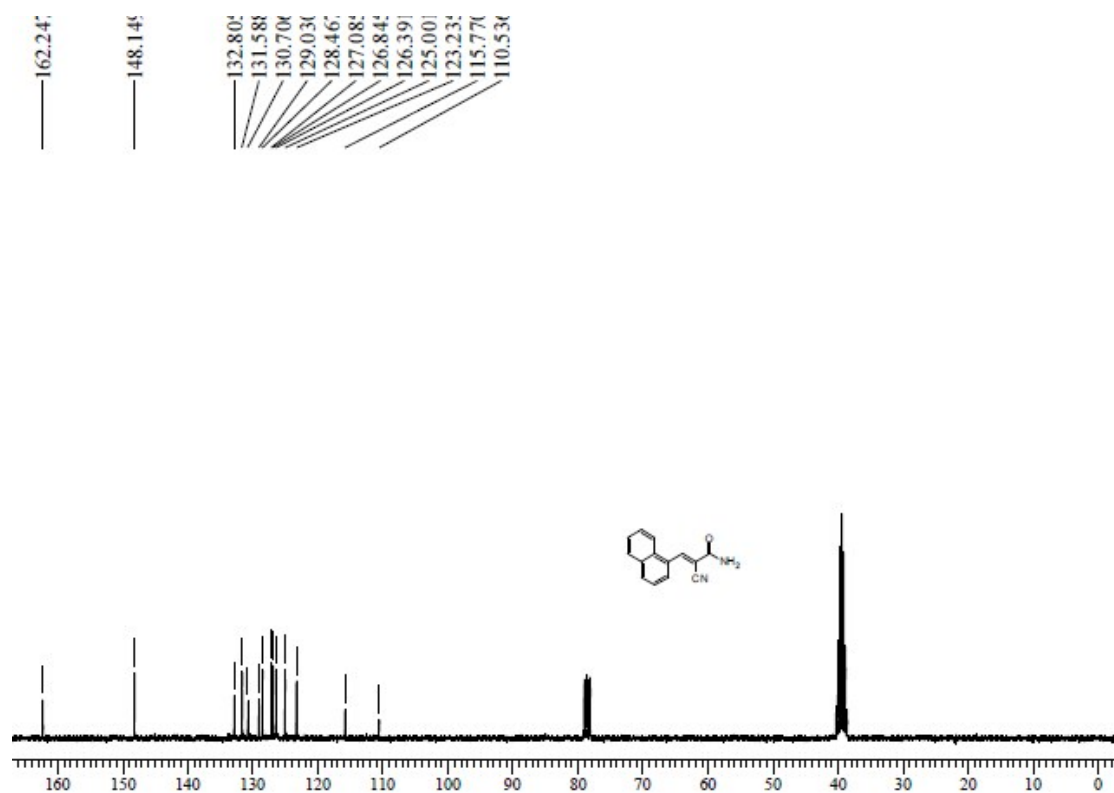

<sup>13</sup>C NMR Spectra of Compound **5s**
